# Supplementary material for: Long Noncoding RNA E2F4as Promotes Progression and Predicts Patient Prognosis in Human Ovarian Cancer
Source: PubMed Central journal article supplement (PMC7761684; doi:10.3390/cancers12123626), 2020-12-03
Supplement: cancers-12-03626-s001.pdf [file cancers-12-03626-s001.pdf]

Article

# Long Noncoding RNA *E2F4as* Promotes Progression and Predicts Patient Prognosis in Human Ovarian Cancer

Sun-Ae Park, Lee Kyung Kim, Young Tae Kim, Tae-Hwe Heo and Hee Jung Kim

Supplementary Materials:

**Table S1.** Primer sequences used in the present study.

| Gene             | Primer Sequence         |                          | Product Size (bp) |
|------------------|-------------------------|--------------------------|-------------------|
|                  | Forward (5'-3')         | Reverse (5'-3')          |                   |
| <i>E2F4as</i>    | GTGTCCCTGTCTCCTGTGGT    | TGAGCTCACCCTGTCCTTG      | 228               |
| E-cadherin       | CGACCCAACCCAAGAATCTA    | AGGCTGTGCCTTCCTACAGA     | 172               |
| N-cadherin       | GACAATGCCCTCAAGTGT      | CCATTAAGCCGAGTGATGGT     | 179               |
| $\beta$ -catenin | TCATGCGTTCTCCTCAGATG    | AATCCACTGGTGAACCAAGC     | 186               |
| Wnt-5 $\beta$    | TCTCAAGAGAGCGAGAAGACT   | CTGCACCGGTTCAAAGCTA      | 191               |
| Twist            | CCGTGGACAGTGATTCCCAG    | CCTTTCAGTGGCTGATTGGC     | 177               |
| Snail            | GCGAGCTGCAGGACTCTAAT    | CCCCTGTCCTCATCTGAGA      | 233               |
| Vimentin         | TCCTCACATTTCGAGCAAAGA   | ATCAAGTCTCAGCGGGCTC      | 161               |
| Claudin-1        | CCTCCTGGGAGTGATAGCAAT   | GGCAACTAAAATAGCCAGACCT   | 145               |
| Slug             | CGAACTGGACACACATACAGTG  | CTGAGGATCTCTGGTTGTGGT    | 87                |
| E2F4             | AGCGGCGGATTTACGACATT    | AATCTCCCGGTATTGCAGC      | 116               |
| U6               | CTCGCTTCGGCAGCACA       | AACGCTTCAGGAATTTGCG      | 92                |
| GAPDH            | TCGACAGTCAGCCGCATCTTCTT | ACCAAATCCGTTGACTCCGACCTT | 186               |
| 18s              | GATATGCTCATGTGGTGTG     | AATCTTCTTCAGTCGCTCCA     | 549               |

**Table S2.** siRNA primer sequences used in the present study.

| No | siRNA name       | Duplex sequence |                                 |
|----|------------------|-----------------|---------------------------------|
| 1  | E2F4as-1         | Sense           | 5' CGGAUUUACGACAUUACCAUU 3'     |
|    |                  | Antisense       | 5' UGGUAAUGUCGUAAAUCCGUU 3'     |
| 2  | E2F4as-2         | Sense           | 5' GAGAUUGCUGACAAACUGAUU 3'     |
|    |                  | Antisense       | 5' UCAGUUUGUCAGCAAUCUCUU 3'     |
| 3  | E2F4as-3         | Sense           | 5' GGACAUCUGCAGAUGCUIUUUU 3'    |
|    |                  | Antisense       | 5' AAAGCAUCUGCAGAUGUCCUU 3'     |
| 4  | E2F4as-4         | Sense           | 5' GUCUCAAUAGGGCAGAAGAAUU 3'    |
|    |                  | Antisense       | 5' UUCUUCUGCCCAUUGAGACUU 3'     |
| 5  | E2F4as-5         | Sense           | 5' CCAGAUUCACCUGAAGAGUUU 3'     |
|    |                  | Antisense       | 5' ACUCUUCAGGUGAAUCUGGUU 3'     |
| 6  | Negative Control | Sense           | 5' CCUCGUGCCGUUCCAUCAGGUAGUU 3' |
|    |                  | Antisense       | 5' CUACCUGAUGGAACGGCACGAGGUU 3' |

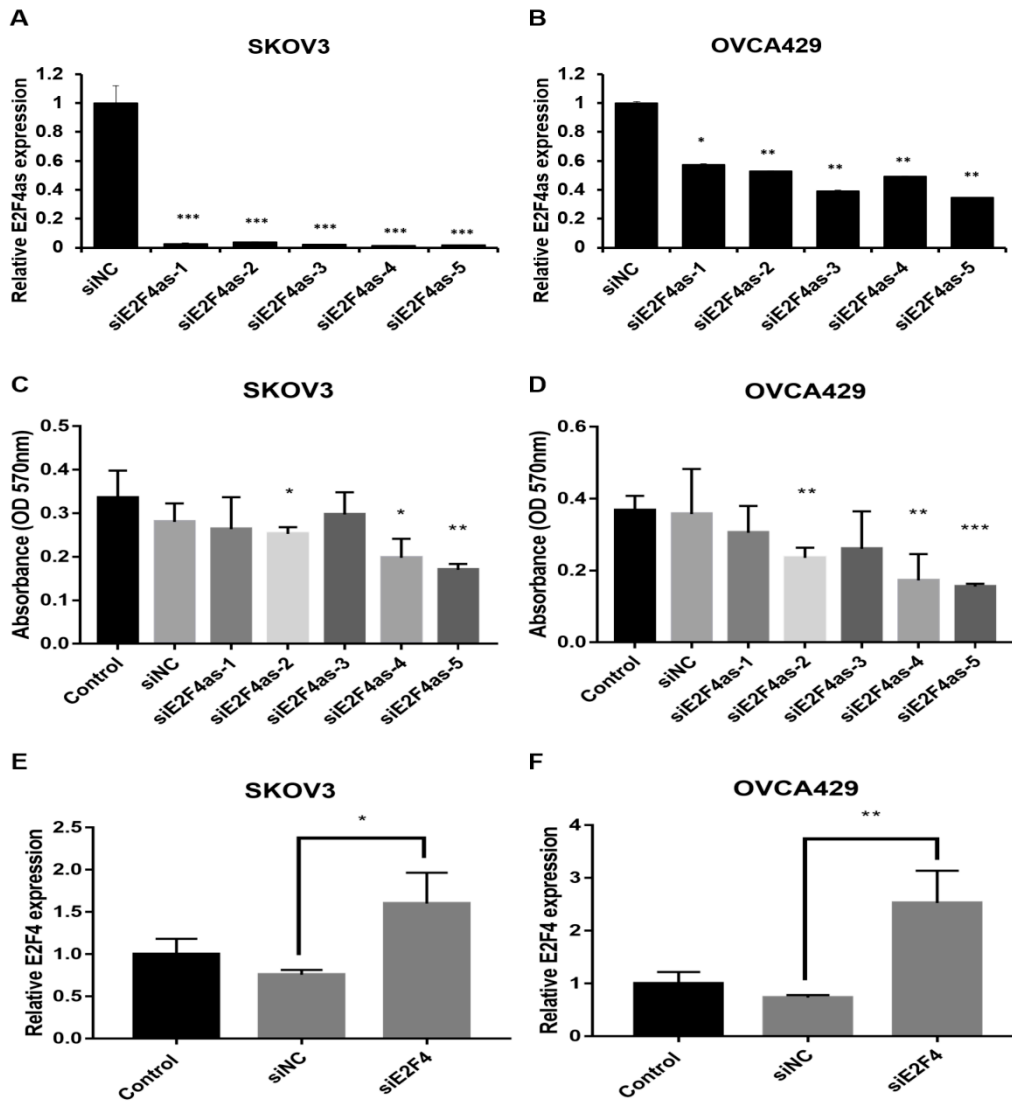

**Figure S1.** The experiment to select siE2F4as in SKOV3 and OVCA429 cell lines. (A, B) The expression of lncRNA *E2F4as* was measured by qRT-PCR in SKOV3 and OVCA429 cell lines of siRNA-*E2F4as* transfection. siE2F4as selected siE2F4as-5, which had the most decreased expression of *E2F4as* through qRT-PCR among several siRNAs. (C, D) siE2F4as selected siE2F4as-5, which had the most decreased expression of *E2F4as* through and MTT assay among several siRNAs. Data expressed as mean  $\pm$  standard deviation; \* $p < 0.05$ , \*\* $p < 0.01$ , \*\*\* $p < 0.001$  vs. siNC. (E, F) The expression of E2F4 was measured by qRT-PCR in SKOV3 and OVCA429 cell lines of si-RNA-*E2F4as* transfection. Data expressed as mean  $\pm$  standard deviation; \* $p < 0.05$ , \*\* $p < 0.01$  vs siNC.

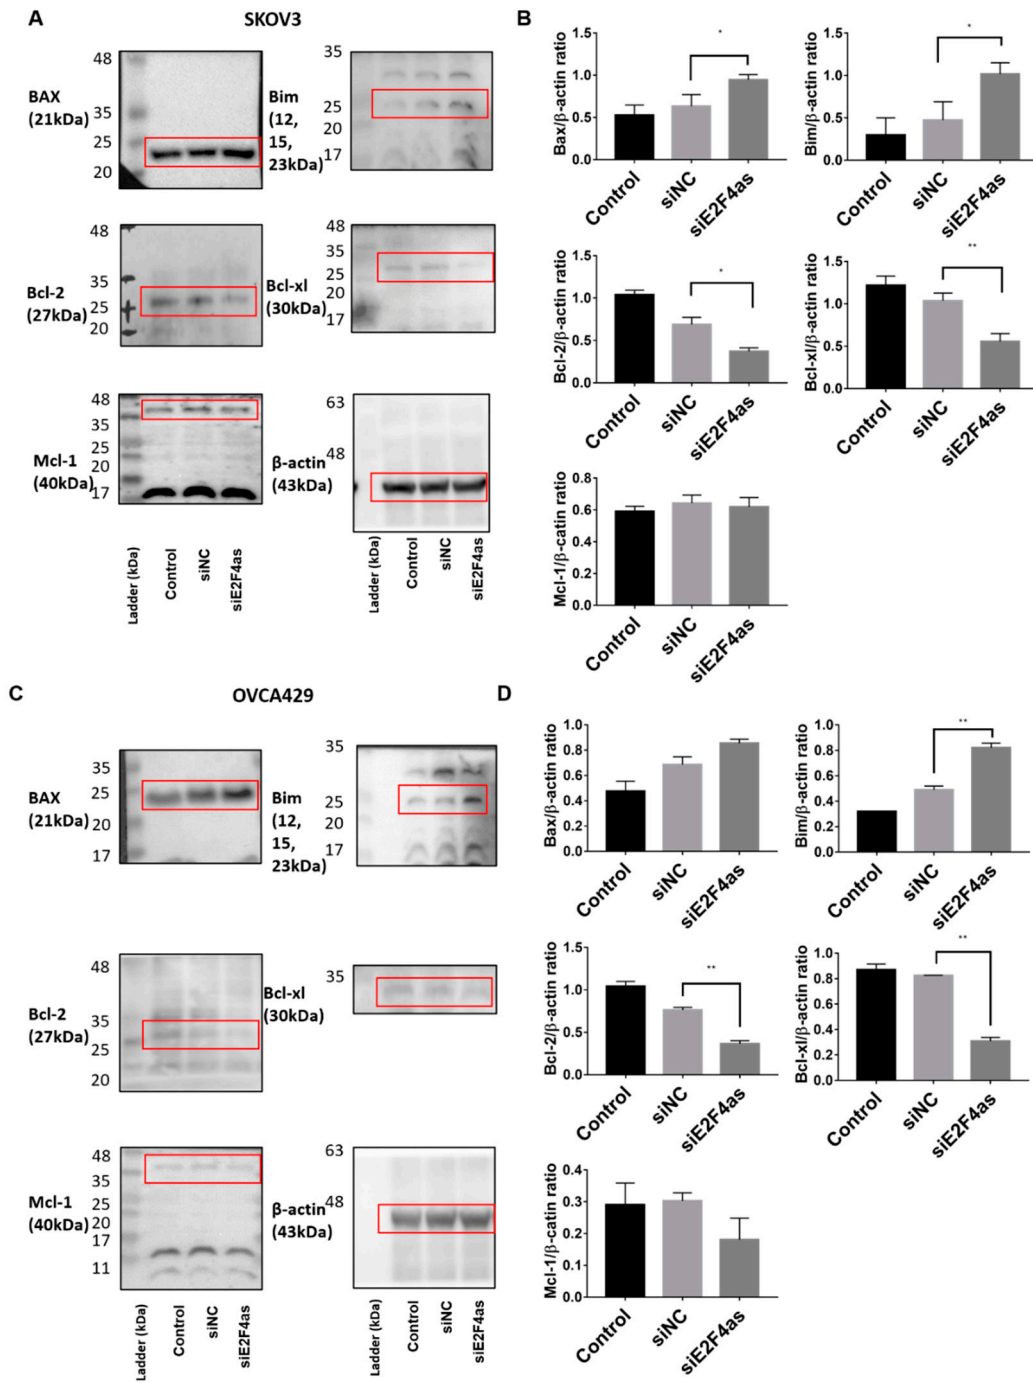

**Figure S2.** The Whole Western Blot for Figure 4. (A, C) Protein lysates obtained from SKOV3 and OVCA429 cells 48 h after transfection with *E2F4as* siRNA (30nM) or negative control. Levels of proteins in pro-apoptosis and anti-apoptosis-associated genes analysed using Western blotting. (B, D) Data were presented as mean  $\pm$  SD from three independent experiments (\* $p < 0.05$ , \*\* $p < 0.01$ , identified by two-way ANOVA vs siNC).

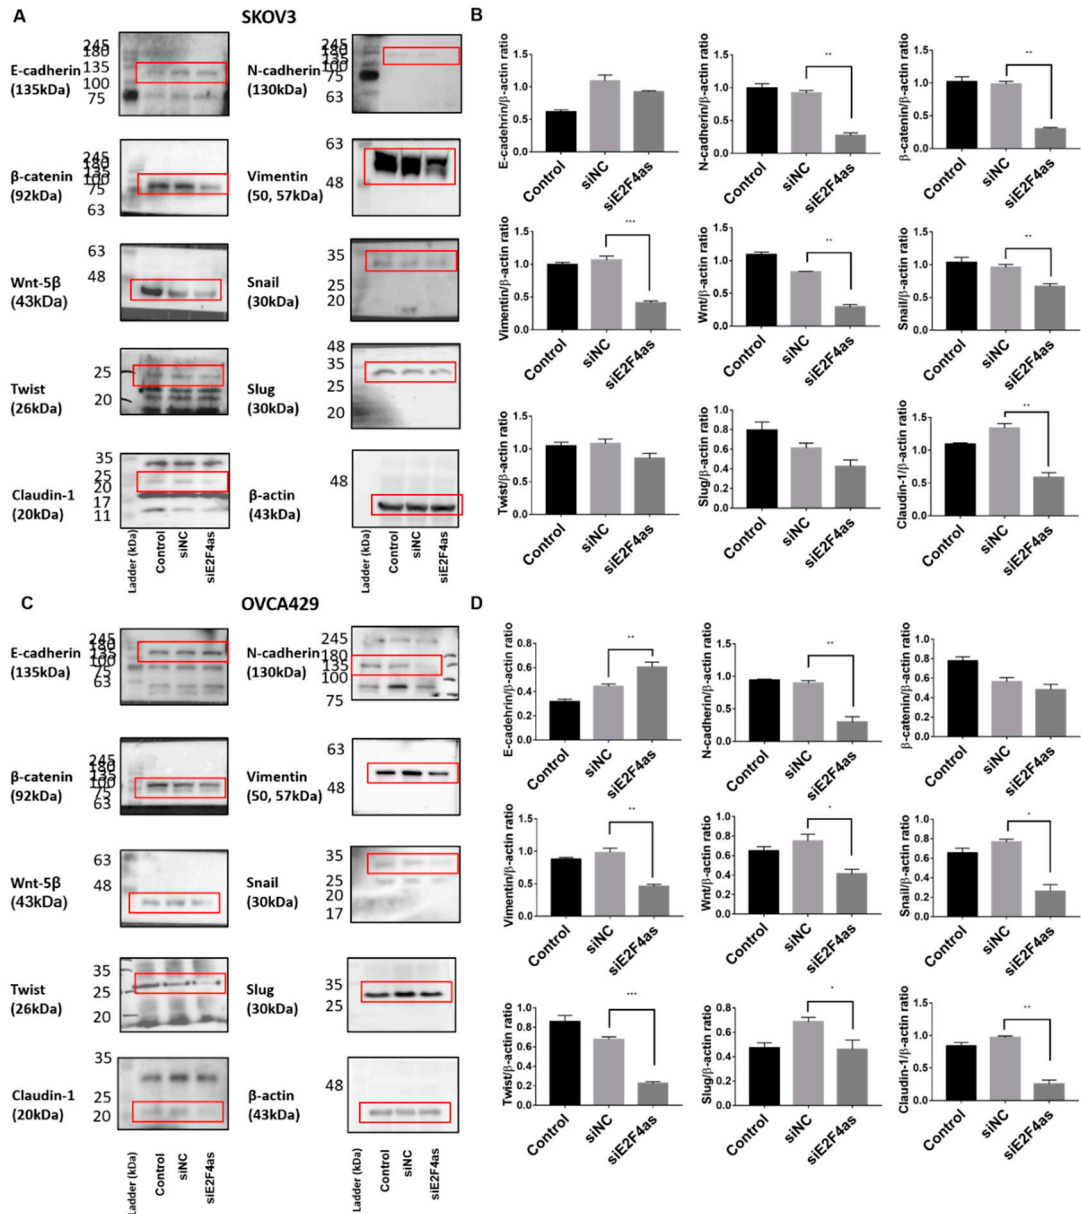

**Figure S3.** The Whole Western Blot for Figure 5. (A, C) Protein lysates obtained from SKOV3 and OVCA429 cells 48 h after transfection with *E2F4as* siRNA (30nM) or negative control. Levels of E-cadherin, N-cadherin,  $\beta$ -catenin, Wnt-5 $\beta$ , Twist, Snail, Slug, Vimentin, and Claudin-1 analysed by Western blotting. (B, D) Data were presented as mean  $\pm$  SD from three independent experiments (\* $p$  < 0.05, \*\* $p$  < 0.01, \*\*\* $p$  < 0.001, identified by two-way ANOVA vs siNC).

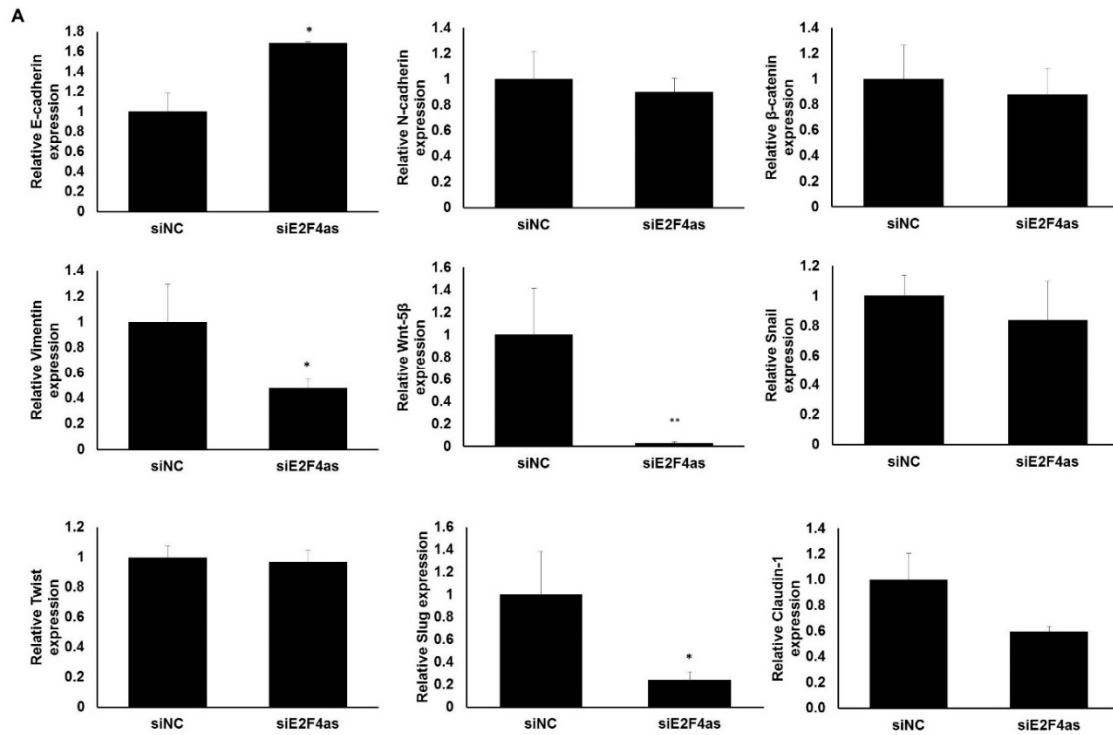

**Figure S4.** EMT-associated genes were analysed by qRT-PCR in mouse tumour tissues. (A) Levels of E-cadherin, N-cadherin,  $\beta$ -catenin, Wnt-5 $\beta$ , Twist, snail, slug, Vimentin and Claudin-1 were analyzed by qRT-PCR in mouse tumour tissues. Data expressed as mean  $\pm$  standard deviation; \* $p < 0.05$ , \*\* $p < 0.01$  vs siNC.

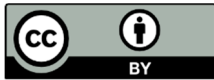

© 2020 by the authors. Submitted for possible open access publication under the terms and conditions of the Creative Commons Attribution (CC BY) license (<http://creativecommons.org/licenses/by/4.0/>).
